1 **Title Page**

2

3 **Manuscript Title**

4 Analysis of SARS-CoV-2 transmission in different settings, among cases and close contacts  
5 from the Tablighi cluster in Brunei Darussalam

6

7 **Manuscript type:** Original Research Article

8

9 **Abstract word count:** 150 words

10 **Manuscript word count:** 3510 words

11

12 **Author Affiliations:**

13 1. Liling CHAW, PhD

14 PAPRSB Institute of Health Sciences, Universiti Brunei Darussalam, Brunei

15

16 2. Wee Chian KOH, PhD

17 Centre for Strategic and Policy Studies, Brunei Darussalam

18

19 3. Sirajul Adli JAMALUDIN, MSc

20 Environmental Health Division, Ministry of Health, Brunei Darussalam

21

22 4. Lin NAING, MD

23 PAPRSB Institute of Health Sciences, Universiti Brunei Darussalam, Brunei

24

25 5. Mohammad Fathi ALIKHAN, MSc

26 Disease Control Division, Ministry of Health, Brunei Darussalam

27

28 6. Justin WONG, MPhil

29 Disease Control Division, Ministry of Health, Brunei Darussalam

30

31 **Corresponding author**

32 Liling Chaw, PhD

33 PAPRSB Institute of Health Sciences, Universiti Brunei Darussalam

34 Jalan Tungku Link Gadong BE1410, Brunei Darussalam

35 Email: [liling.chaw@ubd.edu.bn](mailto:liling.chaw@ubd.edu.bn)

36

37 **Author contributions**

38 Study conceptualisation and design: LC, JW

39 Data acquisition: JW, SJ, FA

40 Data analysis: LC, WCK, LN

41 Data interpretation: LC, WCK, LN, JW

42 Critical revision of the manuscript for important intellectual content: LC, JW, WCK

43 All authors contributed to the writing of the first and final draft.

44

45 **Source of funding**

46 This study does not receive any form of financial support.

47 **Conflict of interest**

48 None to be declared.

49

50 **Article summary line**

51 We highlight the variability of SARS-CoV-2 transmission across different settings, identify  
52 settings at highest risk, and characterize the role of environmental, behavioural, and host factors  
53 in driving SARS-CoV-2 transmission.

54

55 **Running title**

56 SARS-CoV2 transmission across settings in Brunei

57

58 **Biographical sketch**

59 Dr Liling Chaw is a lecturer at the PAPRSB Institute of Health Sciences, Universiti Brunei  
60 Darussalam, Bandar Seri Begawan. Her primary research interests include the burden and  
61 transmission dynamics of infections diseases, particularly on acute respiratory diseases.

62

63

64

65

66 **Abstract**

67

68 We report the transmission dynamics of SARS-CoV-2 across different settings from the initial  
69 COVID-19 cluster in Brunei, arisen from 19 attendees at the Malaysian Tablighi Jama'at  
70 gathering and resulted in 52 locally transmitted cases. Highest non-primary attack rates(ARs)  
71 were observed at a subsequent local religious gathering (14.8% [95%CI: 7.1,27.7]) and in the  
72 household (10.6% [95%CI: 7.3,15.1]). Household ARs of symptomatic cases were higher (14.4%  
73 [95%CI: 8.8,19.9]) than asymptomatic (4.4% [95%CI: 0.0,10.5]) or presymptomatic cases (6.1%  
74 [95%CI: 0.3,11.8]). Low ARs (<1%) were observed for workplace and social settings. Our  
75 analysis highlights that SARS-CoV-2 transmission varies depending on environmental,  
76 behavioural and host factors. We identify 'red flags' of potential super-spreading events, namely  
77 densely populated gatherings for prolonged periods in enclosed settings, presence of individuals  
78 with recent travel history, and group behaviours such as communal eating, sleeping and sharing  
79 of personal hygiene facilities. We propose differentiated testing strategies that account for  
80 transmission risk.

81

82

83

84 **INTRODUCTION**

85

86 Initially reported on December 31, 2019, cases of coronavirus disease (COVID-19) have since  
87 escalated significantly, prompting the World Health Organisation's declaration of a pandemic on  
88 March 11. A rapid response by the global scientific community has described many aspects of  
89 the SARS-CoV-2 virus. Its primary mode of transmission is through respiratory droplets, and  
90 fomite and aerosol transmission may also play a role (1). Asymptomatic transmission has been  
91 observed (2) and the peak infective period appears to be within the first few days of symptom  
92 onset (3). Estimates suggest a basic reproduction number ( $R_0$ ) of 2–3 in the early stages of an  
93 outbreak (4). While the  $R_0$  is valuable in assessing the spread of the outbreak, it can obscure  
94 individual heterogeneity in the level of infectivity, among persons and in different settings (5, 6).  
95 Modelling of the 2003 SARS outbreak indicates that >70% of transmission occurred due to  
96 super-spreading events (SSE) (7). Early reports suggest that similar dynamics may be in play in  
97 the explosive propagation of SARS-CoV-2 (8).

98

99 As part of their mitigation strategies, many countries have adopted stringent yet blunt  
100 'lockdowns' of whole cities and provinces (9) and are implementing exit strategies. In moving  
101 towards a more targeted approach, countries should be able to answer two major questions  
102 regarding the transmission dynamics of SARS-CoV-2: (i) what are the environmental,  
103 behavioural, and host factors that drive transmission? and, (ii) what are the most effective  
104 interventions to control this? To address these, we report on analysis of a transmission chain in  
105 Brunei Darussalam that resulted from an international SSE.

106

107 Brunei (population 459,500) (10) detected its first COVID-19 case on March 9, arising from an  
108 Islamic religious gathering (Tablighi Jama'at) in Kuala Lumpur, Malaysia, a known SSE lasting  
109 four days and attended by >16,000 people, including international participants (11). Of the 135  
110 confirmed cases in Brunei reported as of first week of April, 71 cases (52.6%) have an  
111 epidemiological link to the Tablighi event (Figure 1).

112  
113 Figure 1 – Epidemic curve for the first 135 COVID-19 cases in Brunei Darussalam, by Tablighi  
114 (green bars) and other imported (orange bars) clusters.

115  
116 As SARS-CoV-2 is a novel infection in a naive population, an outbreak investigation of this  
117 event can provide insights into the transmission dynamics of the disease and the effectiveness of  
118 outbreak control measures. The thorough nature of Brunei's contact tracing provides a rare  
119 opportunity to study the epidemiological and transmission characteristics of SARS-CoV-2 in the  
120 community setting.

121  
122 **METHODS**

123  
124 **Surveillance and case identification**

125  
126 Brunei's Ministry of Health has responsibility for communicable disease surveillance. Since  
127 January 23, testing criteria have been implemented for suspected COVID-19 cases. Initially,  
128 individuals with acute respiratory symptoms, and a travel history to a high-risk area were tested  
129 for SARS-CoV-2. Over the next weeks, the program expanded to include: (i) contacts of a

130 confirmed case (regardless of symptoms); (ii) individuals admitted to an inpatient facility with  
131 pneumonia; and (iii) individuals who present to a health facility with acute respiratory illness for  
132 the second time within 14 days. On March 21, Brunei started testing and isolating all travellers  
133 and returning residents. On March 25, SARS-CoV-2 sampling at selected sentinel health centers  
134 was introduced, followed by mandatory random screening for selected groups of foreign workers  
135 on April 7.

136  
137 A confirmed case is defined as a person who tested positive for SARS-CoV-2 through real-time  
138 reverse transcriptase polymerase chain reaction (RT-PCR) test on nasopharyngeal (NP) swab  
139 (12). The first positive case in Brunei was detected on March 9, having met the testing criteria as  
140 a person with fever and cough with a recent travel history to Kuala Lumpur.

141  
142 **Epidemiological investigation**

143  
144 Under the Infectious Disease Act, the Ministry of Health conducted epidemiological  
145 investigation and data collection for each case and close contact using WHO's First Few Cases  
146 protocol (13). The first case was interviewed for demographic characteristics, clinical  
147 symptoms, travel history, activity mapping, and contact history. Upon identification of his  
148 participation at the Tablighi event in Malaysia, and we found that a number of other Bruneians  
149 had also participated at the same event. We subsequently obtained the details of all Bruneian  
150 participants.

151

152 NP swabs were collected from all identified participants and tested with RT-PCR. Those who  
153 tested positive were admitted to the National Isolation Centre (NIC), while those tested negative  
154 were quarantined for 14 days from their return to the country at a designated community  
155 quarantine facility where symptom and temperature screening was conducted daily. Those who  
156 developed symptoms were re-tested. Activity mapping of confirmed cases was conducted, and  
157 contact tracing initiated.

158  
159 A close contact is defined as any person living in the same household, or someone within one  
160 meter of a confirmed case in an enclosed space for more than 15 minutes. All close contacts of  
161 confirmed cases were tested with RT-PCR. Those who tested positive were admitted to NIC,  
162 while those tested negative, were placed under home quarantine for 14 days from last exposure  
163 to the confirmed case. For individuals under home quarantine, their compliance and health status  
164 were monitored daily, through video calls or face-to-face assessments. Those who developed  
165 symptoms during home quarantine were re-tested.

166  
167 **Clinical management**

168  
169 All confirmed cases were treated and isolated at NIC and followed-up until recovery. We  
170 obtained clinical information on their history (including any prior presentation to health  
171 services), examination, laboratory and radiological results from digital inpatient records on the  
172 national health information system database. Additionally, oral history was taken to ascertain  
173 whether they had symptoms up to 14 days prior to diagnosis. Cases were discharged following  
174 two consecutive negative specimens collected at  $\geq 24$ -hour intervals.



175

176 **Cases**

177

178 We categorised cases into two groups: primary (those presumably infected at the Tablighi event  
179 in Malaysia), and non-primary (those who did not attend the Tablighi event but had an  
180 epidemiological link to the primary cases).

181

182 For each case, the symptom status was recorded and classified as: (i) symptomatic, if symptoms  
183 were reported during or prior to NP swab collection; (ii) presymptomatic, if symptoms were  
184 reported after NP sampling but during admission; or (iii) asymptomatic, if no symptoms were  
185 ever reported up to discharge.

186

187 **Close contacts**

188

189 We classified the type of close contact into five settings: household, relatives, workplace, social,  
190 and local religious gathering.

191

192 ‘Household’ is defined as those living in the same household. Among the household members,  
193 their relationship with a case was also recorded and classified as spouse, child, and others  
194 (including other familial relationship or housekeepers living in the same household). ‘Relatives’  
195 is defined as those who live outside the household but are related to the case. ‘Workplace’ is  
196 defined as contacts encountered in the workplace or school. ‘Social’ is defined as those  
197 encountered during travel or in social events. Lastly, ‘local religious gathering’ is defined as

198 those who attended a local religious event in Brunei on March 5, which ran throughout the night  
199 with participants staying overnight.

200

## 201 **Data analysis**

202

203 Group comparison was done between primary and non-primary cases using Chi-square, Fisher's  
204 Exact, or Mann-Whitney's tests as appropriate. Incubation period was calculated from cases  
205 where dates of exposure and symptom onset were clear. Serial interval (SI) was calculated by  
206 subtracting the date of symptom onset of the infectee from the infector; only symptomatic and  
207 pre-symptomatic infector-infectee pairs with clear epidemiological links were included.

208

209 For each setting, the attack rate (AR) was calculated by dividing the number of positive contacts  
210 by the total number of close contacts (that is, the proportion of contacts that tested positive). To  
211 identify risk factors of infection, log-binomial regression analysis was applied to estimate the  
212 risk ratio for gender, age, and setting. Further stratification was done to assess differences in  
213 infector symptom status across settings. The 95% confidence interval (95% CI) was estimated  
214 using the normal-approximation method, or binomial method if the count was less than five.

215

216 The mean observed reproductive number,  $R$ , and the distribution of personal reproductive  
217 numbers in each setting were calculated from the number of infected close contacts caused by  
218 each primary case. The 95% CI was estimated based on the Poisson distribution (14).

219

220 All analyses were conducted using Microsoft Excel and R (ver. 3.6.3) (15). A *p*-value <0.05 was  
221 considered as statistically significant. Ethical approval was obtained from the University  
222 Research Ethics Committee, Universiti Brunei Darussalam (Ref:  
223 UBD/OAVCR/UREC/Apr2020-05).

224

225

## 226 **RESULTS**

227

### 228 **Epidemiological characteristics**

229

230 Seventy-five individuals in Brunei attended the Tablighi event in Malaysia. Of these, 19 were  
231 positive for SARS-CoV-2 resulting in 52 additional cases transmitted locally, bringing the total  
232 cluster size to 71. Figure 2 illustrates the epidemiological links in the cluster by generation in the  
233 transmission chain, and by their symptomatic status. There were 32 (45.1%), 15 (21.1%), and 5  
234 (7.0%) cases in generations one, two, and three, respectively.

235

236 Figure 2 – The Tablighi cluster in Brunei Darussalam, with epidemiological links illustrated by  
237 generation and symptomatic status

238

239 Table 1 shows the demographic and clinical characteristics of the cases in the cluster. The  
240 median age was 33.0 years [Interquartile range (IQR)= 29.0 years], majority male (64.8%,  
241 n=46), and 5 cases (7.1%) had pre-existing chronic conditions. Compared to non-primary cases,  
242 primary cases were significantly older and predominantly male. More than three-quarter of the

243 cases (77.4%, n=55) were diagnosed and immediately admitted to the NIC within 5 days of  
244 symptom onset or NP swab taken (data not shown).

245  
246 A substantial proportion of cases were presymptomatic (31.0%, n=22) or asymptomatic (12.7%,  
247 n=9). 40 (56.3%) patients reported symptoms during contact tracing investigation. The most  
248 commonly reported symptoms were fever, cough, and sore throat. Only one (1.4%) and two  
249 (2.8%) cases were critical and severe, respectively.

250  
251 Table 1 - Demographic and clinical characteristics of COVID-19 cases in Tablighi cluster,  
252 Brunei

253  
254 The incubation period was calculated from eight cases that had confirmed epidemiological links  
255 and had attended the March 5 religious gathering in Brunei. Using their attendance date as the  
256 exposure date, the median incubation period was 4.5 days (IQR= 2.75 days, range= 1 to 11  
257 days). Based on 35 symptomatic infector-infectee pairs, the mean (SD) SI was 4.26 (4.27) days,  
258 ranging from -4 to 17 days. Four pairs (11.4%) had negative SI values. The SI distribution  
259 resembles a normal distribution (Supplementary Figure S1).

260  
261 **Transmission characteristics**

262  
263 Of the 1755 close contacts in the Tablighi cluster, 51 local transmissions were detected, giving  
264 an overall non-primary AR of 2.9% (95% CI: 2.2, 3.8). Case 121 (see Figure 2) was excluded  
265 from this analysis because he was not detected during contact tracing. Highest AR was observed

266 among spouse (41.9% [95% CI: 24.1, 60.7]), followed by the local religious gathering (14.8%  
267 [95% CI: 7.1, 27.7]) and children (14.1% [95% CI: 7.8, 23.8]). The overall household AR is  
268 10.6% (95% CI: 7.3, 15.1).

269

270 Multiple log-binomial regression analyses revealed that type of close contact was the only  
271 statistically significant variable ( $p < 0.001$ ; Table 2). When compared to social contacts, spouses  
272 of positive cases had the highest adjusted risk ratio of getting the infection (45.20 [95% CI: 16.8,  
273 156.1]), followed by the local religious gathering attendees (15.60 [95% CI: 4.8, 59.9]), and their  
274 children (14.09 [95% CI: 4.8, 51.5]).

275

276 Table 2 - Risk factors of SARS-COV2 infection among close contacts

277

278 ARs also differed by symptom status of the infector (Table 3). ARs in households where the  
279 infectors were symptomatic (14.4%) were higher than those who were asymptomatic (4.4%) or  
280 presymptomatic (6.1%). AR for the local religious gathering could not be calculated as three  
281 primary cases at the event had different symptom status; hence we could not ascertain how  
282 transmission occurred. In the household setting, symptomatic cases have 2.66 times higher risk  
283 of transmitting to their close contacts, when compared to asymptomatic and presymptomatic  
284 (crude risk ratio: 2.66 [95% CI: 1.12, 6.34], Table S1).

285

286 Table 3 - Attack rates in different settings, stratified by symptom status of the infector

287

288 The mean observed R was highest in the local religious gathering (2.67), followed by the  
289 household setting (0.67 [95% CI: 0.44, 0.96]) (Table 4). The distribution of the observed R in the  
290 household setting was skewed towards zero (Figure S2). 71.4% of household infections (20 of 28  
291 positive contacts) were from 16.7% of cases (7 of 42 possible links).

292

293 Table 4 – Characteristics and mean observed R for each setting

294

295

## 296 **DISCUSSION**

297

298 We characterise the Tablighi Jama'at cluster that started the COVID-19 epidemic in Brunei. Our  
299 analysis reveals several key findings. First, SSE plays an important role in SARS-CoV-2  
300 transmission. Second, there is high transmission variability across different settings. Third,  
301 transmission varies between symptomatic vs. asymptomatic and presymptomatic cases, and we  
302 highlight the potential for silent chains of transmission.

303

## 304 **SSE**

305

306 Within this cluster, 38% of all cases were participants at an SSE: 19 (26.7%) from the Tablighi  
307 event in Malaysia, and eight (11.3%) from the local religious gathering in Brunei. Notably, 19 of  
308 the 75 Brunei attendees at the Tablighi event tested positive. Assuming a representative sample,  
309 this would suggest an AR of 25%, implying that approximately 4,000 cases (of an estimated  
310 16,000 participants) may have been infected at that Malaysian event. Moreover, we find that the

311 highest overall non-primary AR and mean observed R was at the local religious gathering (AR=  
312 14.8%, R= 2.67), which was higher than that observed in the household setting (AR= 10.6%, R=  
313 0.67). These observations suggest a role for mass gatherings in facilitating SARS-CoV2  
314 transmission.

315  
316 The Tablighi is an apolitical Islamic movement with a presence in nearly 200 countries. Tablighi  
317 adherents usually travel to gather at annual international events each lasting several days.  
318 Communal prayers, meals and speeches form part of these events. In Malaysia, the participants  
319 stayed and slept at the mosque, and several participants were deputised to cook meals and clean.  
320 Smaller gatherings, usually every week or so take place in their home countries, with other  
321 adherents. Over the course of this investigation, we identified several common characteristics at  
322 both the local religious gathering and the Tablighi event in Malaysia (11). First, significant  
323 numbers of people gathered in an enclosed area for a prolonged period. Second, attendees had a  
324 recent travel history – the Tablighi event in Malaysia drew participants from across the world,  
325 while the local religious gathering had at least three individuals who had recently returned from  
326 Malaysia. Third, communal sharing of sleeping areas and toilets, and shared dining were  
327 observed. We propose that these three characteristics are hallmarks for the development of SSE  
328 for SARS-CoV-2 transmission and can be used as ‘red flags’ by health authorities in their risk  
329 assessment and mitigation strategies for preventing and detecting high risk activities including  
330 mass gatherings, and other institutional settings such as care homes, prisons and dormitories.

331

332 **Variability of non-primary AR across different settings**

333

334 To a lesser degree, our observations on the within-household transmission are similar to that  
335 observed for the two religious gatherings. Out of 16 household contacts who subsequently  
336 became first generation cases, 10 (62.5%) of these were from just three primary cases. As such,  
337 even within similar settings, we can expect wide variability in transmission patterns. This  
338 observation supports our finding of a moderately high household AR but an observed R of less  
339 than one, suggesting that transmission is driven by a relatively small number of cases (5). High  
340 ARs in spouses and children reflect intimate relationships with high degree of interaction, close  
341 proximity, and in the case of the spouse, sleeping in the same room. Concordant with our SSE  
342 findings, we suggest that encounters among groups of people that involve close proximity in  
343 enclosed settings for prolonged time periods (at least for one night) is a main driver of SARS-  
344 CoV-2 transmission.

345  
346 Our overall non-primary AR result of 10.6% in the household setting is comparable to other  
347 studies that used contact-tracing datasets (16-19). A study near Wuhan, China (20) reported a  
348 higher AR of 16.3%; however, they detected 56.2% of their cases more than five days after  
349 symptom onset. By contrast, 77.4% of the cases in our study were detected and isolated within  
350 five days of symptom onset, suggesting that early case isolation can reduce AR. The aggressive  
351 testing of contacts strategy employed may have contributed to this.

352  
353 We note the low non-primary AR (<1%) and mean observed R (<0.3) for workplace and social  
354 settings. While moderate physical distancing was implemented in Brunei following the  
355 identification of this cluster, there was no community quarantine or lockdown, public services  
356 and businesses remained open, and no internal movement restrictions were imposed.



357

358 Combined with our observations on the role of SSE in driving SARS-CoV-2 transmission, we  
359 suggest that in areas with limited community transmission full lockdown measures that adopt a  
360 blunt approach by restricting all movement can be avoided, in favour of a more targeted  
361 approach that includes a combination of case isolation, contact tracing, and moderate levels of  
362 physical distancing that take into account the ‘red flags’ for mass gatherings identified earlier.  
363 However, this approach is resource intensive and only feasible where there is sufficient public  
364 health capacity. The high asymptomatic proportion suggest that even with best efforts at contact  
365 tracing, potential for widespread community transmission is clear. Once established, suppression  
366 necessitates the implementation of broader physical distancing measures (9, 21). Nonetheless, if  
367 done effectively, contact tracing and case isolation approaches are shown to control the COVID-  
368 19 outbreak during its early stage (22). Modelling studies using South Korean data showed that  
369 less extreme physical distancing measures can help to suppress the outbreak (23).

370

### 371 **Symptomatic vs. asymptomatic and presymptomatic transmission**

372

373 We identified several environmental (settings) and behavioural factors that potentially account  
374 for higher ARs observed in mass gatherings and in the household. In order to assess the impact  
375 of host factors in driving transmission, we compared non-primary AR in symptomatic vs.  
376 asymptomatic and presymptomatic individuals, considering the high proportion of asymptomatic  
377 (12.7%) and presymptomatic (31.0%) of cases.

378

379 While there are case reports of presumptive asymptomatic and presymptomatic transmission (24,  
380 25), observational studies quantifying such transmission are few. A study from Ningbo, China  
381 analysed the overall ARs in symptomatic vs. asymptomatic cases and did not find significant  
382 difference between the two groups (26). Another study, re-interpreted the same data and  
383 theorized that under certain conditions, symptomatic cases could be more transmissible than  
384 asymptomatic ones (27). In fact, our overall crude risk ratio for symptomatic cases showed no  
385 significant difference when compared with asymptomatic and/or presymptomatic cases (Table 3,  
386 Table S1). However, we suggest that this masks the true picture in transmissibility when  
387 different settings are taken into account.

388  
389 In our study, we do not find a significant difference in AR in non-household settings. These  
390 settings usually practice some form of non-pharmaceutical interventions (NPI)—individuals with  
391 moderate and severe symptoms may be on medical leave, and it is reasonable to expect some  
392 physical distancing would be practiced by contacts of persons who display visible symptoms.  
393 This is less feasible within the household setting; hence we suggest that transmission occurs  
394 more frequently at the household level where control measures are less practical. We observed  
395 that the household AR for symptomatic cases (14.4%) is higher than that of asymptomatic  
396 (4.1%) or presymptomatic cases (6.1%), suggesting that the presence of symptoms is a host  
397 factor in driving transmission.

398  
399 The higher household AR observed among symptomatic cases suggest that testing for such cases  
400 should be prioritised, especially in low resource areas with limited testing capacity. Nonetheless,  
401 an AR of 4.4% and 6.1% in asymptomatic and presymptomatic cases, respectively, is not

402 negligible. As such, our findings have several implications for high resource areas with greater  
403 testing capacity. First, it strengthens the argument for testing household contacts in the absence  
404 of symptoms. Second, there is a need to allow for ‘slack’ in the surveillance system as the high  
405 proportion of asymptomatic cases pose challenges for rapid detection and isolation. We  
406 recommend that even in countries with highly developed testing and tracing capacities, moderate  
407 levels of social distancing should be implemented to account for this. Third, proactive testing of  
408 travellers, attendees at ‘red flag’ events, and institutional settings may be necessary to contain  
409 COVID-19 spread.

410  
411 This study has several limitations. First, as a retrospective study based on a contact tracing  
412 dataset, the index case determination or the direction of transmission may be uncertain,  
413 particularly as a substantial proportion of cases are asymptomatic. Moreover, without accounting  
414 for outside sources of infection, setting-specific SARs could have been overestimated (although  
415 no community transmission has been detected in Brunei). Viral sequencing can  
416 confirm homology between the strains infecting the index and secondary cases across the various  
417 settings, however this was not conducted for all cases. Second, we have not accounted for other  
418 potential environmental factors such as the relative size of the household, time spent at home  
419 with others, air ventilation, and indirect transmission through fomites. Third, we do not have  
420 information on NPIs practiced by the close contacts; presumably, individuals would take  
421 precautions during an outbreak. Fourth, symptom status of the cases was reported during their  
422 swab collection date. We assume this to be reflective of their actual condition when their close  
423 contacts were exposed, however, this may not be necessarily true for all cases. Finally, the

424 generalizability of our results are limited due to no community transmission, a lack of cases in  
425 settings such as residential care facilities and dormitories, and small number of cases.

426  
427 The main strength of our study is the availability of a complete contact tracing dataset at the  
428 national level. Since all contacts were tested, it is reasonable to assume that this study more  
429 accurately detects SARS-CoV-2 transmission than those that only test symptomatic contacts. In  
430 conclusion, our analysis highlights the variability of SARS-CoV-2 transmission across different  
431 settings and in particular, the role of SSEs. We identify ‘red flags’ for the development of  
432 potential SSEs, and describe environmental, behavioural, and host factors that drive transmission.  
433 Overall, we provide evidence that a combination of case isolation, contact tracing, and moderate  
434 physical distancing measures is an effective approach to containment.

435

#### 436 **Acknowledgement**

437 The authors would like to thank Mr Haji Mohamad Ruzaimi Haji Rosli from Corporate  
438 Communications, Ministry of Health Brunei, for his assistance in designing the figure for this  
439 manuscript.

440

441

442

443

444 Figure and table captions:

445 Figure 1 – Epidemic curve for the first 135 COVID-19 cases in Brunei Darussalam, by Tablighi  
446 (green bars) and other imported (orange bars) clusters.

447 Figure 2 – The Tablighi cluster in Brunei Darussalam, with epidemiological links illustrated by  
448 generation and symptomatic status

449 Table 1 - Demographic and clinical characteristics of COVID-19 cases in Tablighi cluster,  
450 Brunei

451 Table 2 - Risk factors of SARS-COV2 infection among close contacts

452 Table 3 - Attack rates in different settings, stratified by symptom status of the infector

453 Table 4 – Characteristics and mean observed R for each setting

454

455

456

457 Supplementary information:

458 **Figure S1.** Distribution of the serial interval, fitted with a normal distribution

459 **Figure S2.** Distribution of the household observed R

460 Table S1. Attack rates in different settings, stratified by symptom status of the infector  
461 (symptomatic versus presymptomatic and asymptomatic)

462

463

464

465

466

467 **References**

468

469

470

- 471 1. Ong SWX, Tan YK, Chia PY, Lee TH, Ng OT, Wong MSY, et al. Air, Surface  
472 Environmental, and Personal Protective Equipment Contamination by Severe Acute Respiratory  
473 Syndrome Coronavirus 2 (SARS-CoV-2) From a Symptomatic Patient. *JAMA*. 2020.  
474 2. Furukawa N, Brooks J, Sobel J. Evidence Supporting Transmission of Severe Acute  
475 Respiratory Syndrome Coronavirus 2 While Presymptomatic or Asymptomatic. *Emerging*  
476 *Infectious Disease journal*. 2020;26(7).  
477 3. He X, Lau EHY, Wu P, Deng X, Wang J, Hao X, et al. Temporal dynamics in viral  
478 shedding and transmissibility of COVID-19. *Nature Medicine*. 2020 2020/04/15.  
479 4. Kucharski AJ, Russell TW, Diamond C, Liu Y, Edmunds J, Funk S, et al. Early dynamics  
480 of transmission and control of COVID-19: a mathematical modelling study. *The Lancet*  
481 *Infectious Diseases*. 2020.  
482 5. Liu Y, Eggo RM, Kucharski AJ. Secondary attack rate and superspreading events for  
483 SARS-CoV-2. *The Lancet*. 2020;395(10227):e47.  
484 6. Stein ML, van der Heijden PGM, Buskens V, van Steenberghe JE, Bengtsson L,  
485 Koppeschaar CE, et al. Tracking social contact networks with online respondent-driven  
486 detection: who recruits whom? *BMC Infectious Diseases*. 2015 2015//;15(1):1-12.  
487 7. Li Y, Yu ITS, Xu P, Lee JHW, Wong TW, Ooi PL, et al. Predicting Super Spreading  
488 Events during the 2003 Severe Acute Respiratory Syndrome Epidemics in Hong Kong and  
489 Singapore. *Am J Epidemiol*. 2004;160(8):719-28.  
490 8. !!! INVALID CITATION !!! [Frieden, 2020 #4083].  
491 9. Lau H, Khosrawipour V, Kocbach P, Mikolajczyk A, Schubert J, Bania J, et al. The  
492 positive impact of lockdown in Wuhan on containing the COVID-19 outbreak in China. *Journal of*  
493 *Travel Medicine*. 2020.  
494 10. Department of Economic Planning and Development. Mid-year population estimates for  
495 Brunei Darussalam, 2019. 2020 [cited 2020 22 April]; Available from:  
496 <http://www.deps.gov.bn/SitePages/Population.aspx>  
497 11. Mat NFC, Edinur HA, Razab MKAA, Safuan S. A Single Mass Gathering Resulted in  
498 Massive Transmission of COVID-19 Infections in Malaysia with Further International Spread.  
499 *Journal of Travel Medicine*. 2020.  
500 12. Wong J, Koh WC, Momin RN, Alikhan MF, Fadillah N, Naing L. Probable causes and  
501 risk factors for positive SARS-CoV-2 test in recovered patients: Evidence from Brunei  
502 Darussalam. *Journal of Medical Virology*. 2020 2020/06/19;n/a(n/a).  
503 13. World Health Organization. The First Few X (FFX) Cases and contact investigation  
504 protocol for 2019-novel coronavirus (2019-nCoV) infection, version 2. 2020.  
505 14. Liu Y, Gayle AA, Wilder-Smith A, Rocklöv J. The reproductive number of COVID-19 is  
506 higher compared to SARS coronavirus. *Journal of Travel Medicine*. 2020;27(2).  
507 15. R Core Team. R: A language and environment for statistical computing. R Foundation  
508 for Statistical Computing, Vienna, Austria; 2020.  
509 16. Cheng H-Y, Jian S-W, Liu D-P, Ng T-C, Huang W-T, Lin H-H. High transmissibility of  
510 COVID-19 near symptom onset. *medRxiv*. 2020:2020.03.18.20034561.  
511 17. Luo L, Liu D, Liao X-I, Wu X-b, Jing Q-I, Zheng J-z, et al. Modes of contact and risk of  
512 transmission in COVID-19 among close contacts. *medRxiv*. 2020:2020.03.24.20042606.

- 513 18. Bi Q, Wu Y, Mei S, Ye C, Zou X, Zhang Z, et al. Epidemiology and Transmission of  
514 COVID-19 in Shenzhen China: Analysis of 391 cases and 1,286 of their close contacts.  
515 medRxiv. 2020:2020.03.03.20028423.
- 516 19. Jing Q-L, Liu M-J, Yuan J, Zhang Z-B, Zhang A-R, Dean NE, et al. Household  
517 Secondary Attack Rate of COVID-19 and Associated Determinants. medRxiv.  
518 2020:2020.04.11.20056010.
- 519 20. Li W, Zhang B, Lu J, Liu S, Chang Z, Cao P, et al. The characteristics of household  
520 transmission of COVID-19. *Clinical Infectious Diseases*. 2020.
- 521 21. Sjödin H, Wilder-Smith A, Osman S, Farooq Z, Rocklöv J. Only strict quarantine  
522 measures can curb the coronavirus disease (COVID-19) outbreak in Italy, 2020.  
523 *Eurosurveillance*. 2020;25(13):2000280.
- 524 22. Hellewell J, Abbott S, Gimma A, Bosse NI, Jarvis CI, Russell TW, et al. Feasibility of  
525 controlling COVID-19 outbreaks by isolation of cases and contacts. *The Lancet Global Health*.  
526 2020.
- 527 23. Park SW, Sun K, Viboud C, Grenfell BT, Dushoff J. Potential roles of social distancing in  
528 mitigating the spread of coronavirus disease 2019 (COVID-19) in South Korea. medRxiv.  
529 2020:2020.03.27.20045815.
- 530 24. Wei WE, Li Z, Chiew CJ, Yong SE, Toh MP, Lee VJ. Presymptomatic Transmission of  
531 SARS-CoV-2 — Singapore, January 23–March 16, 2020. *MMWR Morb Mortal Wkly Rep*. 2020.
- 532 25. Qian G, Yang N, Ma AHY, Wang L, Li G, Chen X, et al. COVID-19 Transmission Within  
533 a Family Cluster by Presymptomatic Carriers in China. *Clinical Infectious Diseases*. 2020.
- 534 26. Chen Y, Wang A, Yi B, Ding K, Wang H, Wang J, et al. The epidemiological  
535 characteristics of infection in close contacts of COVID-19 in Ningbo city  
536 . *Chinese Journal of Epidemiology*. 2020;41.
- 537 27. He D, Zhao S, Lin Q, Zhuang Z, Cao P, Wang MH, et al. The relative transmissibility of  
538 asymptomatic cases among close contacts. *International Journal of Infectious Diseases*.  
539 2020;94:145-7.
- 540

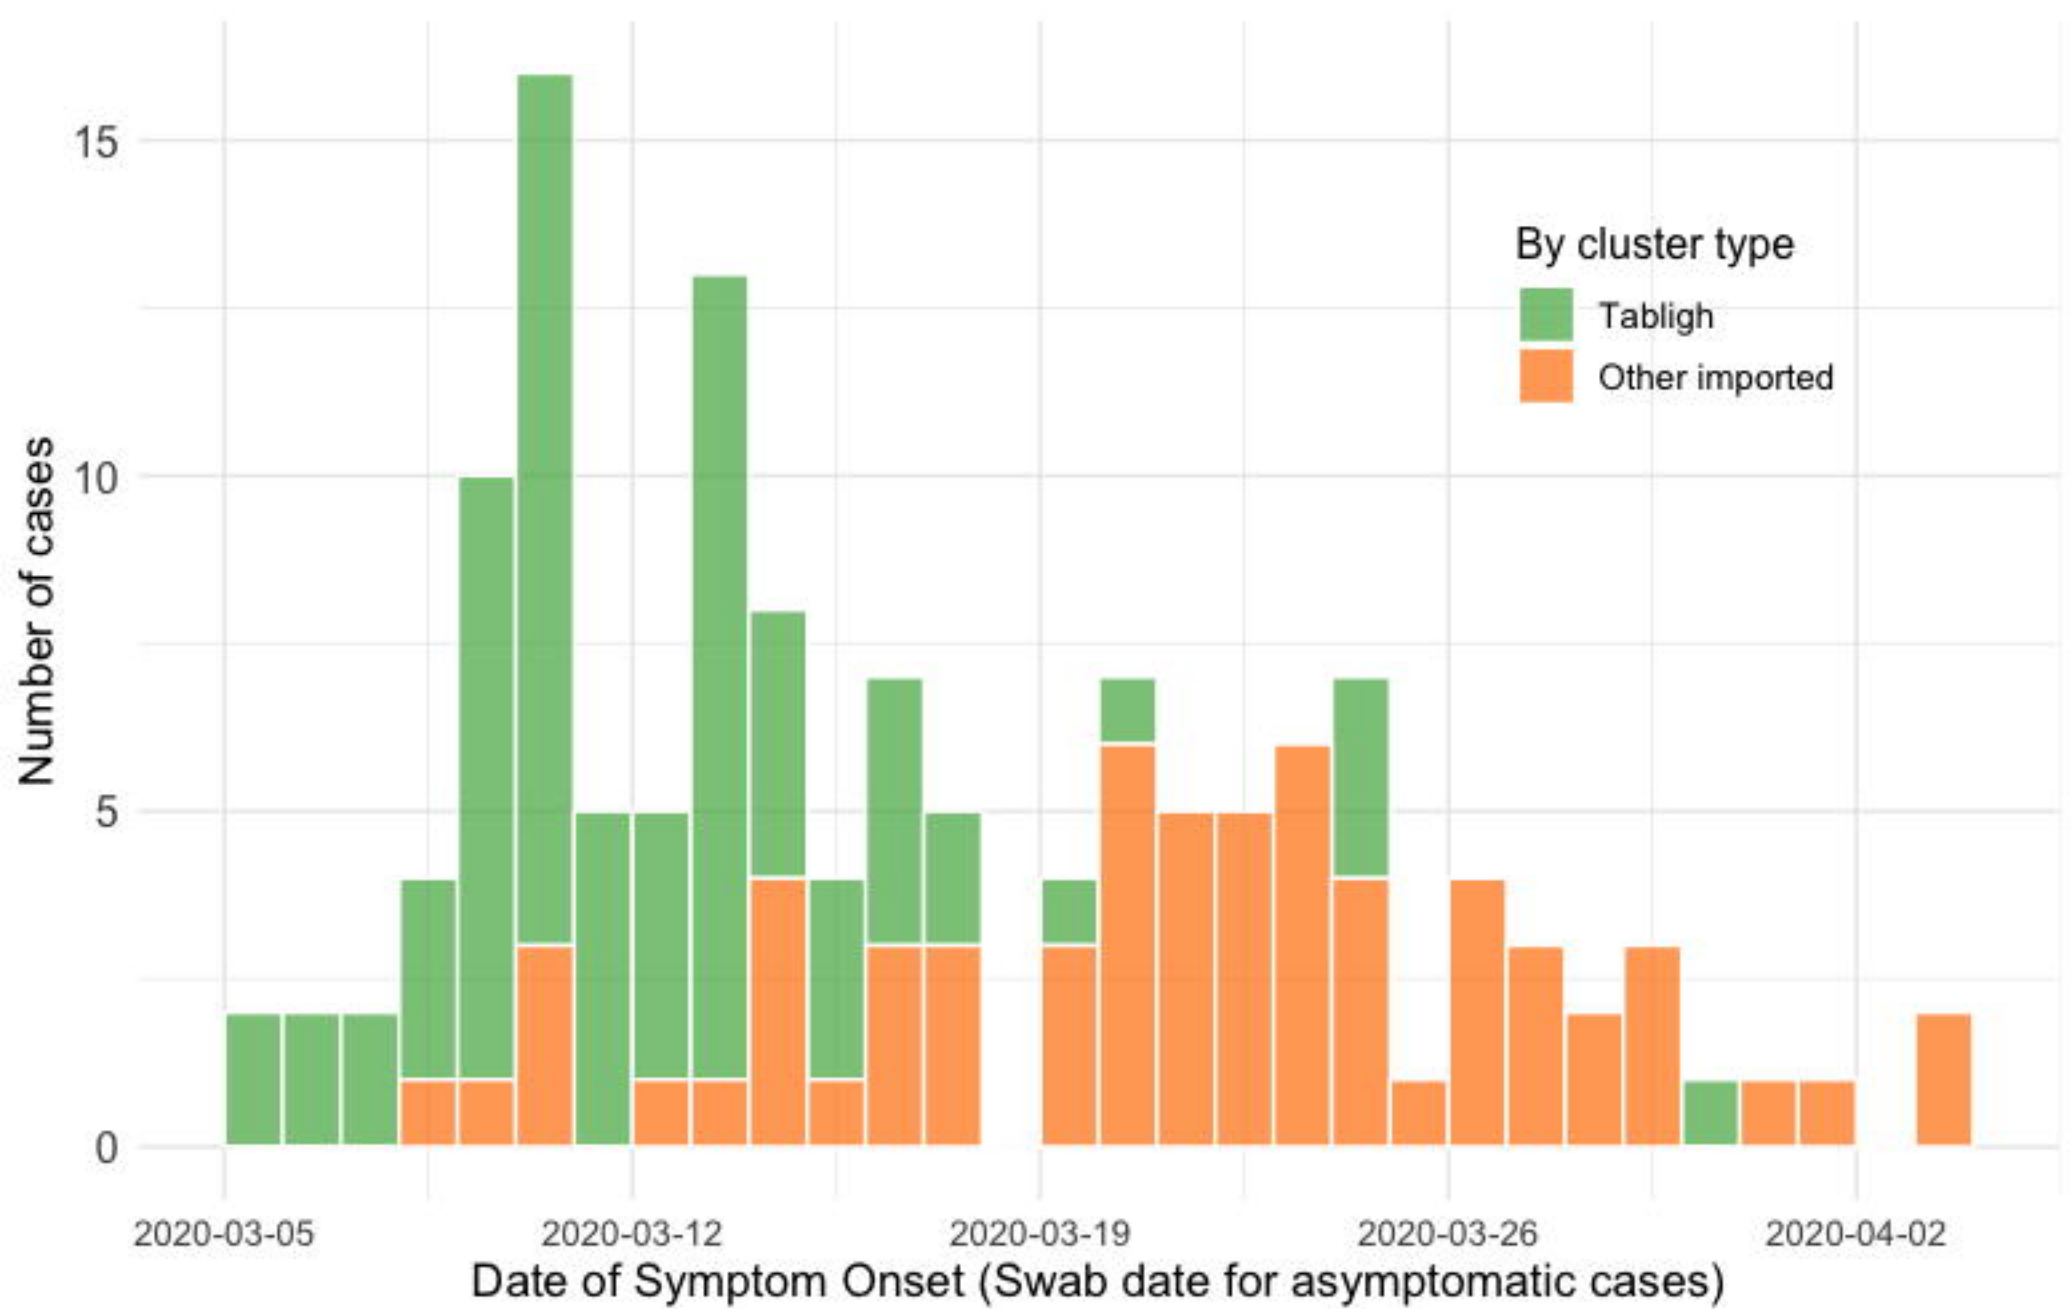



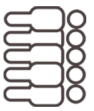

**Tablighi Jamaat Religious Gathering**  
Kuala Lumpur, Malaysia  
28 February - 1 March 2020

Legend:

-  Symptomatic Case
-  Presymptomatic Case
-  Asymptomatic Case

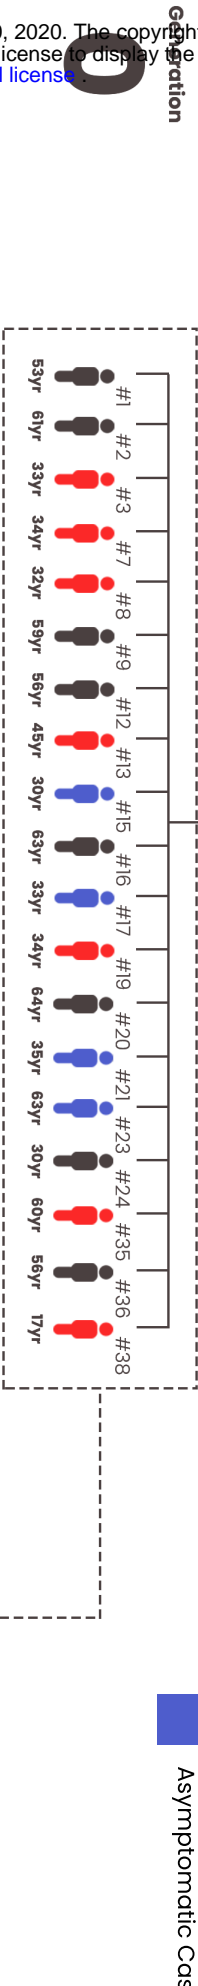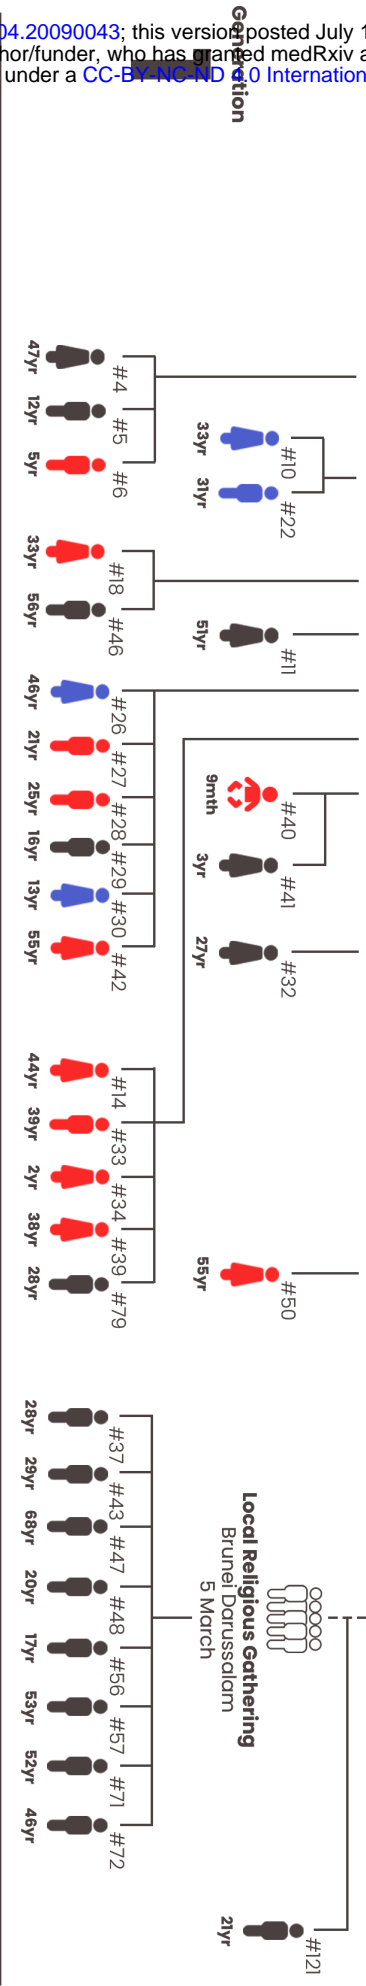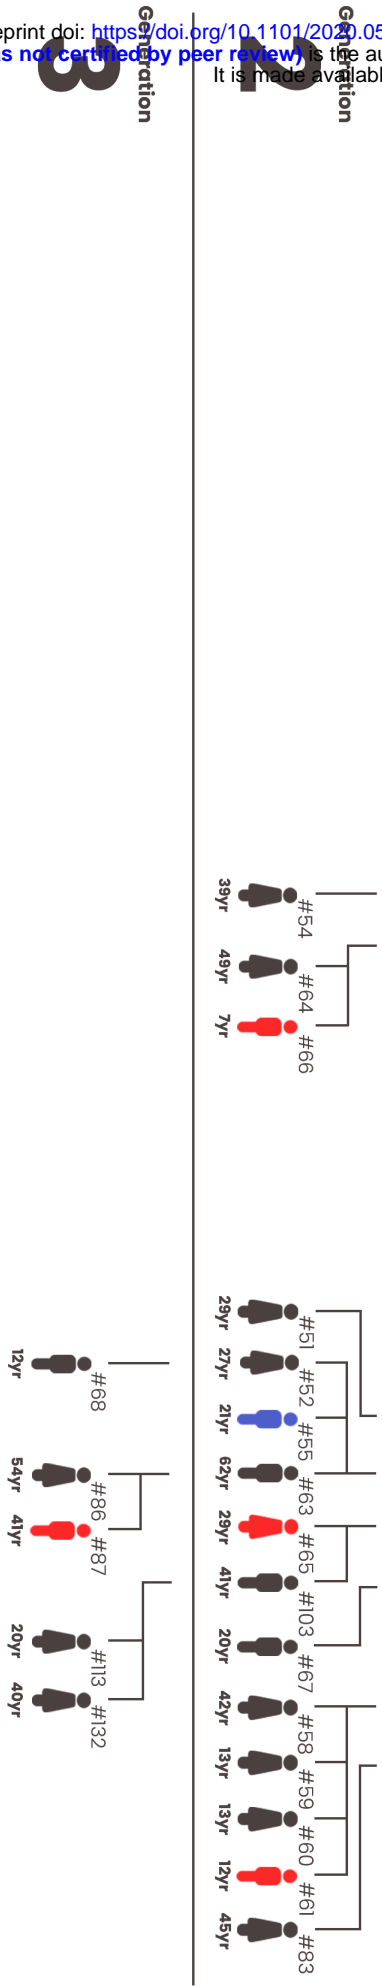

**3**
